# Supplementary material for: “Sabatier principle” of d electron number for describing the nitrogen reduction reaction performance of single-atom alloy catalysts
Source: Royal Society of Chemistry journal article supplement (doi:10.1039/d2ta04140e), 2022-01-01
Supplement: d2ta04140e1.pdf [file d2ta04140e1.pdf]

### Supporting Information

"Sabatier principle" of  $d$  electron number for describing the nitrogen reduction  
reaction performance on single-atom alloy catalysts

Tianyi Dai, Zhili Wang, Xingyou Lang,\* Qing Jiang\*

*Key Laboratory of Automobile Materials, Ministry of Education, and School of  
Materials Science and Engineering, Jilin University, Changchun 130022, China*

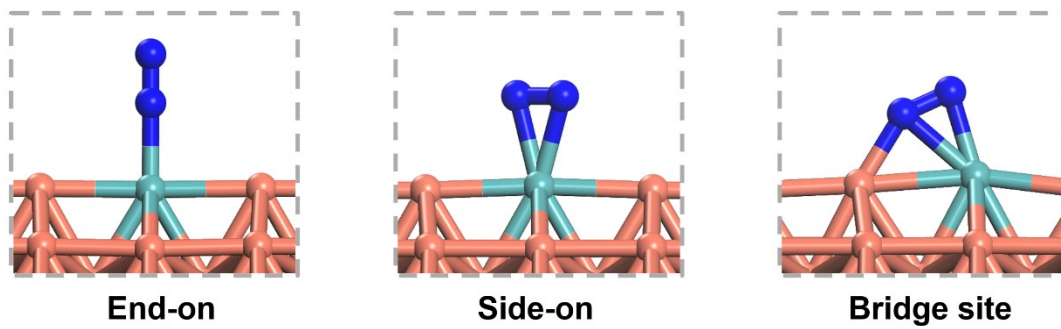

**Fig. S1** The illustrations of the N<sub>2</sub> adsorption configurations.

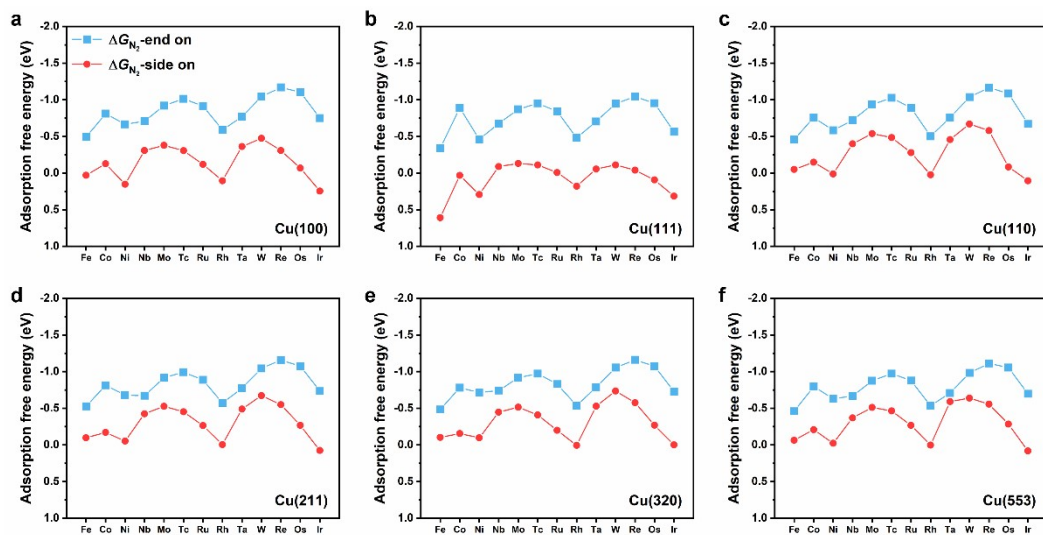

**Fig. S2** Adsorption free energy values of  $N_2$  in different adsorption configurations on the Cu-based SAAs.

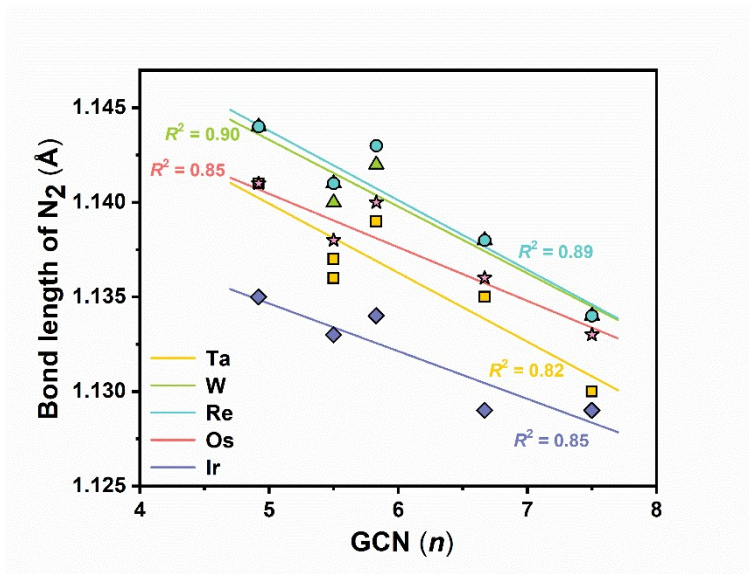

**Fig. S3** The linear relation between the bond lengths of adsorbed N<sub>2</sub> and the generalized coordination number (GCN) of the relative catalytic sites.

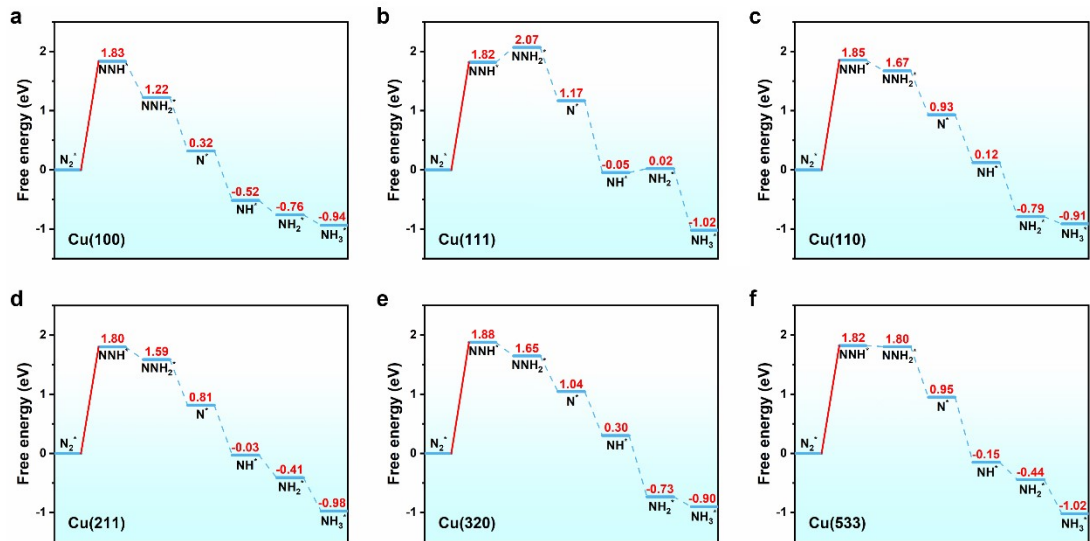

**Fig. S4** Gibbs free energy diagrams for NRR on (a) Cu(100), (b) Cu(111), (c) Cu(110), (d) Cu(211), (e) Cu(320) and (f) Cu(533).

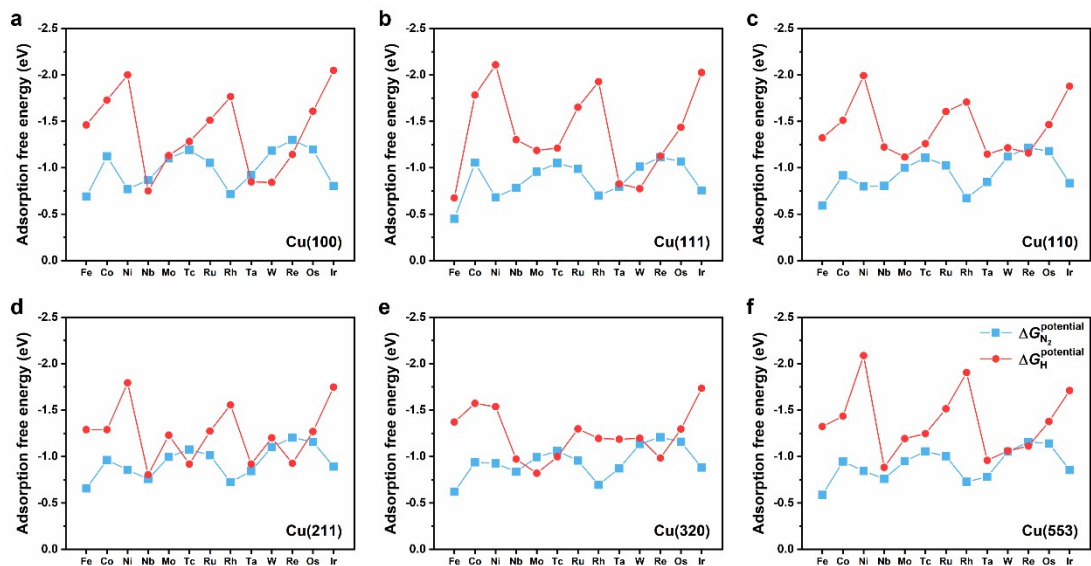

**Fig. S5** Adsorption free energy values of  $N_2$  (blue) and  $H^+$  (red) under the limiting potential ( $U_L$ ) on the Cu-based SAAs.

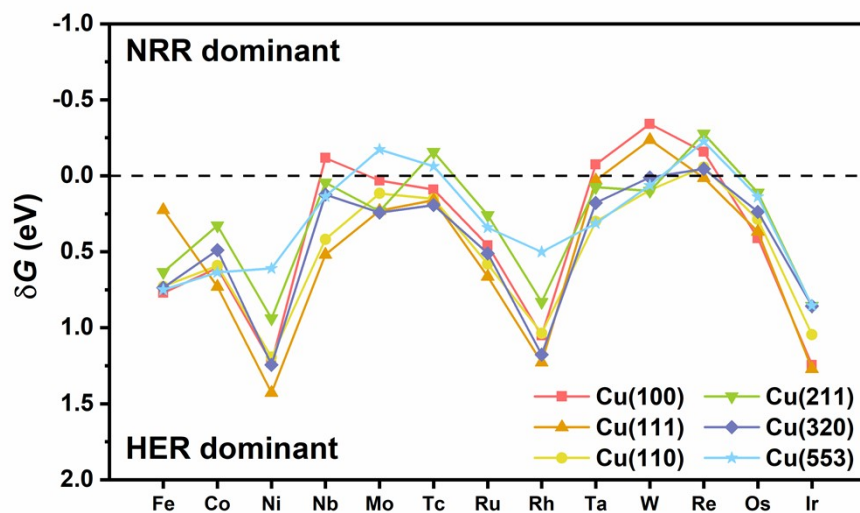

**Fig. S6** Adsorption free energy difference ( $\delta G$ ) values of  $N_2^*$  and  $H^*$  under the  $U_L$  on the Cu-based SAAs.

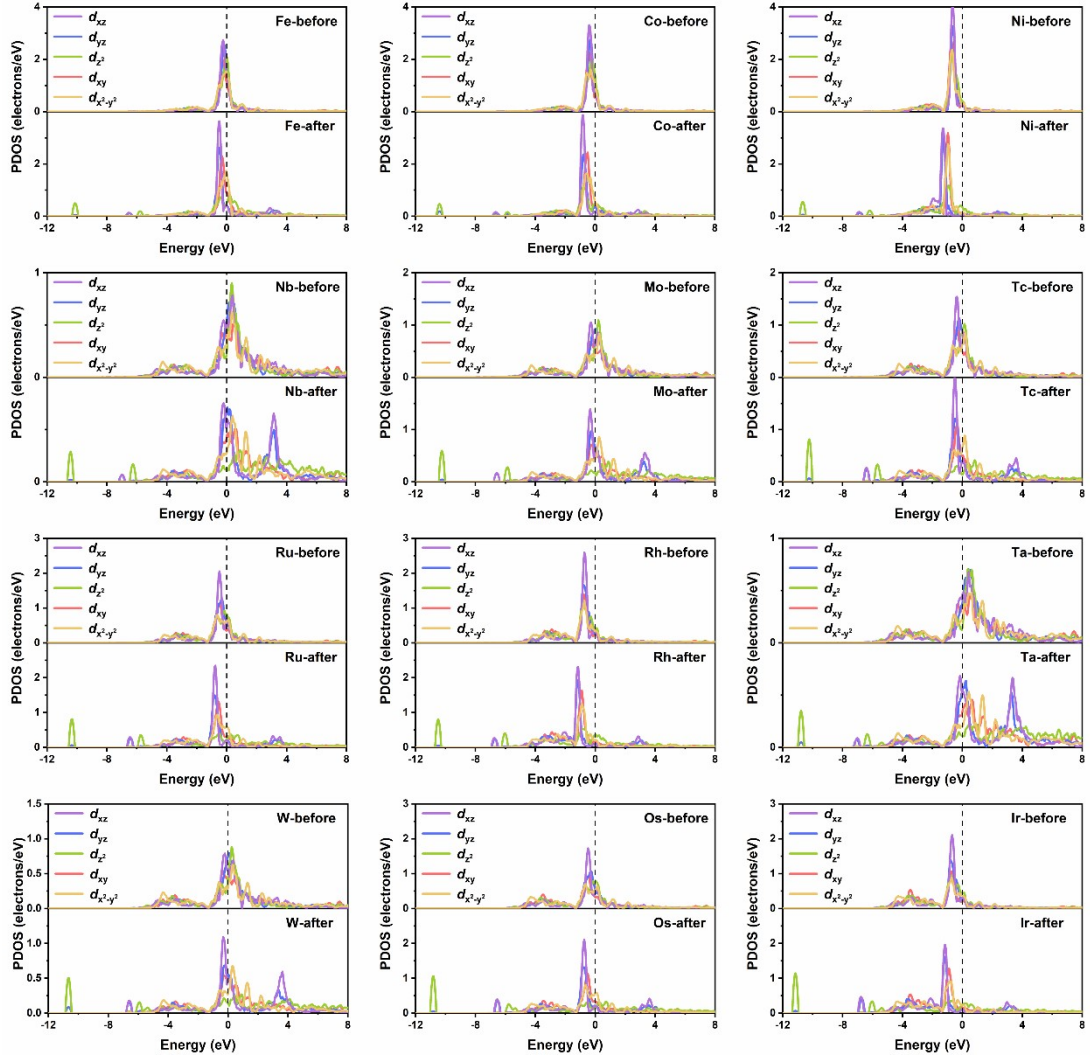

**Fig. S7** The PDOS of TM- $d$  orbitals in TM-Cu(553) before and after  $N_2$  adsorption.



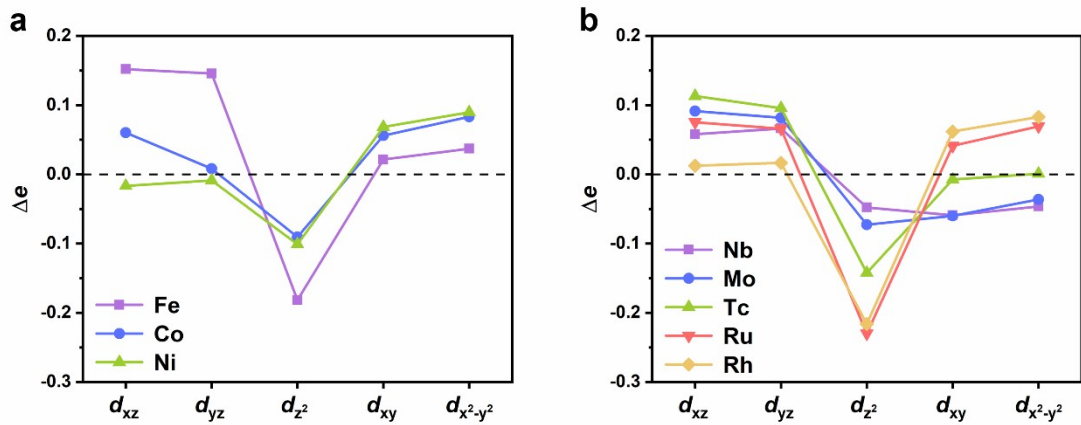

**Fig. S8** The difference of the integral PDOS of  $d$  orbitals in the  $N_2$  adsorption process.

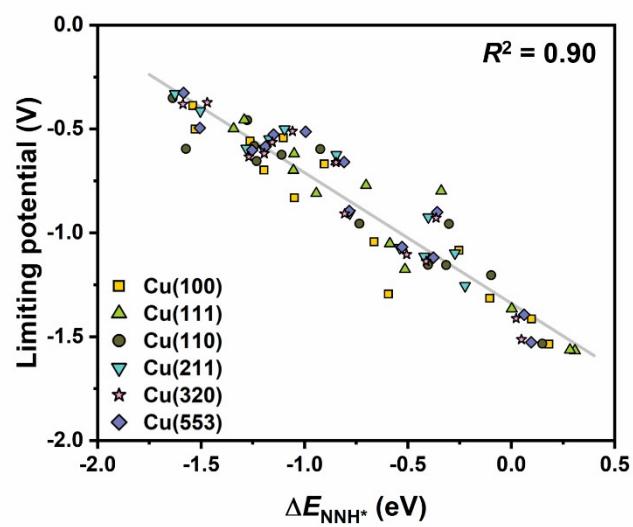

**Fig. S9** The scaling relationship between the computed  $U_L$  and the adsorption energy of  $\text{NNH}^*$  species ( $\Delta E_{\text{NNH}^*}$ ).

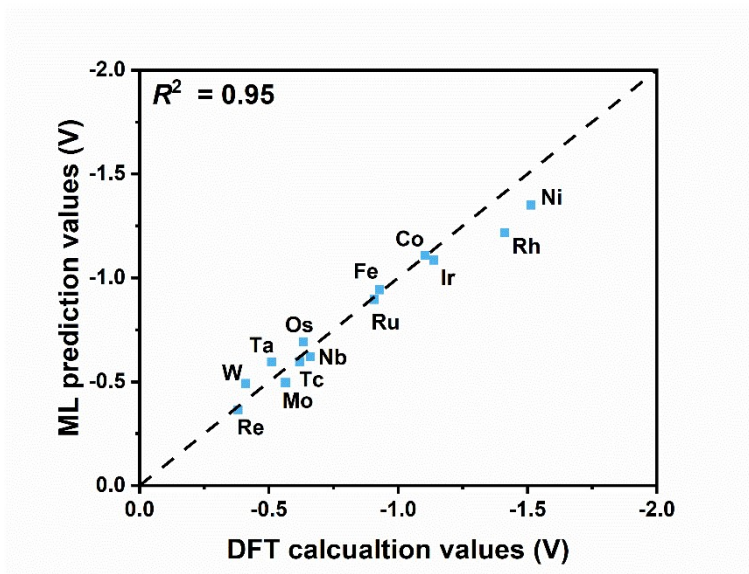

**Fig. S10** Parity plot comparing DFT-calculated and ML-predicted values for  $U_L$  of the NRR on the TM-Cu(311) system.

**Table S1** The reduction potential of the transition metals.

| <b>Element</b> | <b>Reaction</b>                                                                        | <b><math>E^0/V</math></b> |
|----------------|----------------------------------------------------------------------------------------|---------------------------|
| Fe             | $\text{Fe}^{3+} + 3e^- \rightleftharpoons \text{Fe}$                                   | -0.037                    |
| Co             | $\text{Co}^{2+} + 2e^- \rightleftharpoons \text{Co}$                                   | -0.280                    |
| Ni             | $\text{Ni}^{2+} + 2e^- \rightleftharpoons \text{Ni}$                                   | -0.257                    |
| Nb             | $\text{Nb}^{3+} + 3e^- \rightleftharpoons \text{Nb}$                                   | -1.099                    |
| Mo             | $\text{Mo}^{3+} + 3e^- \rightleftharpoons \text{Mo}$                                   | -0.200                    |
| Tc             | $\text{Ta}^{2+} + 2e^- \rightleftharpoons \text{Ta}$                                   | 0.400                     |
| Ru             | $\text{Ru}^{2+} + 2e^- \rightleftharpoons \text{Ru}$                                   | 0.455                     |
| Rh             | $\text{Rh}^{3+} + 3e^- \rightleftharpoons \text{Rh}$                                   | 0.758                     |
| Ta             | $\text{Ta}^{3+} + 3e^- \rightleftharpoons \text{Ta}$                                   | -0.600                    |
| W              | $\text{W}^{3+} + 3e^- \rightleftharpoons \text{W}$                                     | 0.100                     |
| Re             | $\text{Re}^{3+} + 3e^- \rightleftharpoons \text{Re}$                                   | 0.300                     |
| Os             | $\text{OsO}_4 + 8\text{H}^+ + 8e^- \rightleftharpoons \text{Os} + 4\text{H}_2\text{O}$ | 0.838                     |
| Ir             | $\text{Ir}^{3+} + 3e^- \rightleftharpoons \text{Ir}$                                   | 1.156                     |

**Table S2** The differences of  $\Delta G_{N_2}$  values ( $\Delta G_{N_2}(\text{end-on}) - \Delta G_{N_2}(\text{side-on})$ ) of  $N_2$  in end-on and side-on adsorption configurations.

| <b>Catalysts</b> | <b>Energy difference/eV</b> | <b>Catalysts</b> | <b>Energy difference/eV</b> |
|------------------|-----------------------------|------------------|-----------------------------|
| Fe-Cu(100)       | -0.52                       | Fe-Cu(111)       | -0.95                       |
| Co-Cu(100)       | -0.68                       | Co-Cu(111)       | -0.92                       |
| Ni-Cu(100)       | -0.82                       | Ni-Cu(111)       | -0.75                       |
| Nb-Cu(100)       | -0.40                       | Nb-Cu(111)       | -0.59                       |
| Mo-Cu(100)       | -0.54                       | Mo-Cu(111)       | -0.74                       |
| Tc-Cu(100)       | -0.71                       | Tc-Cu(111)       | -0.84                       |
| Ru-Cu(100)       | -0.80                       | Ru-Cu(111)       | -0.83                       |
| Rh-Cu(100)       | -0.69                       | Rh-Cu(111)       | -0.66                       |
| Ta-Cu(100)       | -0.41                       | Ta-Cu(111)       | -0.65                       |
| W-Cu(100)        | -0.57                       | W-Cu(111)        | -0.84                       |
| Re-Cu(100)       | -0.86                       | Re-Cu(111)       | -1.00                       |
| Os-Cu(100)       | -1.04                       | Os-Cu(111)       | -1.05                       |
| Ir-Cu(100)       | -1.00                       | Ir-Cu(111)       | -0.88                       |
| Fe-Cu(110)       | -0.41                       | Fe-Cu(211)       | -0.43                       |
| Co-Cu(110)       | -0.61                       | Co-Cu(211)       | -0.64                       |
| Ni-Cu(110)       | -0.59                       | Ni-Cu(211)       | -0.63                       |
| Nb-Cu(110)       | -0.32                       | Nb-Cu(211)       | -0.25                       |
| Mo-Cu(110)       | -0.40                       | Mo-Cu(211)       | -0.39                       |
| Tc-Cu(110)       | -0.54                       | Tc-Cu(211)       | -0.54                       |
| Ru-Cu(110)       | -0.61                       | Ru-Cu(211)       | -0.62                       |
| Rh-Cu(110)       | -0.53                       | Rh-Cu(211)       | -0.57                       |
| Ta-Cu(110)       | -0.30                       | Ta-Cu(211)       | -0.28                       |
| W-Cu(110)        | -0.37                       | W-Cu(211)        | -0.37                       |
| Re-Cu(110)       | -0.59                       | Re-Cu(211)       | -0.61                       |
| Os-Cu(110)       | -1.00                       | Os-Cu(211)       | -0.81                       |
| Ir-Cu(110)       | -0.78                       | Ir-Cu(211)       | -0.81                       |
| Fe-Cu(320)       | -0.40                       | Fe-Cu(553)       | -0.38                       |
| Co-Cu(320)       | -0.59                       | Co-Cu(553)       | -0.63                       |
| Ni-Cu(320)       | -0.61                       | Ni-Cu(553)       | -0.62                       |
| Nb-Cu(320)       | -0.30                       | Nb-Cu(553)       | -0.29                       |
| Mo-Cu(320)       | -0.36                       | Mo-Cu(553)       | -0.40                       |
| Tc-Cu(320)       | -0.51                       | Tc-Cu(553)       | -0.56                       |
| Ru-Cu(320)       | -0.61                       | Ru-Cu(553)       | -0.63                       |
| Rh-Cu(320)       | -0.54                       | Rh-Cu(553)       | -0.54                       |
| Ta-Cu(320)       | -0.12                       | Ta-Cu(553)       | -0.26                       |
| W-Cu(320)        | -0.34                       | W-Cu(553)        | -0.32                       |
| Re-Cu(320)       | -0.56                       | Re-Cu(553)       | -0.59                       |
| Os-Cu(320)       | -0.77                       | Os-Cu(553)       | -0.80                       |
| Ir-Cu(320)       | -0.78                       | Ir-Cu(553)       | -0.73                       |

**Table S3** The calculated N≡N bond length and charge of N<sub>2</sub> on Cu-based SAAs.

| <b>Catalysts</b> | <b>Bond length/Å</b> | <b>Charge/ e </b> |
|------------------|----------------------|-------------------|
| Fe-Cu(100)       | 1.132                | -0.092            |
| Co-Cu(100)       | 1.134                | -0.093            |
| Ni-Cu(100)       | 1.128                | -0.046            |
| Nb-Cu(100)       | 1.133                | -0.099            |
| Mo-Cu(100)       | 1.134                | -0.127            |
| Tc-Cu(100)       | 1.134                | -0.010            |
| Ru-Cu(100)       | 1.132                | -0.119            |
| Rh-Cu(100)       | 1.127                | -0.080            |
| Ta-Cu(100)       | 1.135                | -0.081            |
| W-Cu(100)        | 1.138                | -0.115            |
| Re-Cu(100)       | 1.138                | -0.123            |
| Os-Cu(100)       | 1.136                | -0.105            |
| Ir-Cu(100)       | 1.129                | -0.066            |
| Fe-Cu(111)       | 1.133                | -0.099            |
| Co-Cu(111)       | 1.131                | -0.074            |
| Ni-Cu(111)       | 1.126                | -0.024            |
| Nb-Cu(111)       | 1.126                | -0.056            |
| Mo-Cu(111)       | 1.130                | -0.093            |
| Tc-Cu(111)       | 1.131                | -0.074            |
| Ru-Cu(111)       | 1.129                | -0.098            |
| Rh-Cu(111)       | 1.125                | -0.060            |
| Ta-Cu(111)       | 1.130                | -0.042            |
| W-Cu(111)        | 1.134                | -0.077            |
| Re-Cu(111)       | 1.134                | -0.093            |
| Os-Cu(111)       | 1.133                | -0.085            |
| Ir-Cu(111)       | 1.129                | -0.048            |
| Fe-Cu(110)       | 1.132                | -0.079            |
| Co-Cu(110)       | 1.133                | -0.083            |
| Ni-Cu(110)       | 1.127                | -0.044            |
| Nb-Cu(110)       | 1.134                | -0.099            |
| Mo-Cu(110)       | 1.138                | -0.130            |
| Tc-Cu(110)       | 1.137                | -0.103            |
| Ru-Cu(110)       | 1.135                | -0.128            |
| Rh-Cu(110)       | 1.128                | -0.086            |
| Ta-Cu(110)       | 1.139                | -0.084            |
| W-Cu(110)        | 1.142                | -0.116            |
| Re-Cu(110)       | 1.143                | -0.130            |
| Os-Cu(110)       | 1.140                | -0.118            |
| Ir-Cu(110)       | 1.134                | -0.080            |
| Fe-Cu(211)       | 1.132                | -0.080            |
| Co-Cu(211)       | 1.134                | -0.084            |
| Ni-Cu(211)       | 1.128                | -0.041            |
| Nb-Cu(211)       | 1.132                | -0.081            |

|            |       |        |
|------------|-------|--------|
| Mo-Cu(211) | 1.135 | -0.118 |
| Tc-Cu(211) | 1.134 | -0.086 |
| Ru-Cu(211) | 1.132 | -0.114 |
| Rh-Cu(211) | 1.127 | -0.079 |
| Ta-Cu(211) | 1.137 | -0.075 |
| W-Cu(211)  | 1.141 | -0.105 |
| Re-Cu(211) | 1.141 | -0.113 |
| Os-Cu(211) | 1.138 | -0.105 |
| Ir-Cu(211) | 1.133 | -0.071 |
| Fe-Cu(320) | 1.131 | -0.076 |
| Co-Cu(320) | 1.132 | -0.080 |
| Ni-Cu(320) | 1.128 | -0.049 |
| Nb-Cu(320) | 1.134 | -0.117 |
| Mo-Cu(320) | 1.137 | -0.139 |
| Tc-Cu(320) | 1.137 | -0.101 |
| Ru-Cu(320) | 1.135 | -0.126 |
| Rh-Cu(320) | 1.128 | -0.090 |
| Ta-Cu(320) | 1.141 | -0.102 |
| W-Cu(320)  | 1.144 | -0.127 |
| Re-Cu(320) | 1.144 | -0.130 |
| Os-Cu(320) | 1.141 | -0.117 |
| Ir-Cu(320) | 1.135 | -0.085 |
| Fe-Cu(553) | 1.132 | -0.067 |
| Co-Cu(553) | 1.132 | -0.074 |
| Ni-Cu(553) | 1.127 | -0.031 |
| Nb-Cu(553) | 1.133 | -0.079 |
| Mo-Cu(553) | 1.135 | -0.105 |
| Tc-Cu(553) | 1.135 | -0.080 |
| Ru-Cu(553) | 1.134 | -0.111 |
| Rh-Cu(553) | 1.126 | -0.070 |
| Ta-Cu(553) | 1.136 | -0.059 |
| W-Cu(553)  | 1.140 | -0.092 |
| Re-Cu(553) | 1.141 | -0.107 |
| Os-Cu(553) | 1.138 | -0.098 |
| Ir-Cu(553) | 1.133 | -0.064 |

**Table S4** The calculated  $\Delta G_{\text{PDS}}$  of the NRR on Cu-based SAAs.

| Catalysts  | PDS                                                    | $\Delta G_{\text{PDS}}/\text{eV}$ |
|------------|--------------------------------------------------------|-----------------------------------|
| Fe-Cu(100) | $\text{N}_2^* \rightarrow \text{NNH}^* \text{ (R1)}$   | 1.08                              |
| Co-Cu(100) | $\text{N}_2^* \rightarrow \text{NNH}^* \text{ (R1)}$   | 1.30                              |
| Ni-Cu(100) | $\text{N}_2^* \rightarrow \text{NNH}^* \text{ (R1)}$   | 1.54                              |
| Nb-Cu(100) | $\text{N}_2^* \rightarrow \text{NNH}^* \text{ (R1)}$   | 0.67                              |
| Mo-Cu(100) | $\text{N}_2^* \rightarrow \text{NNH}^* \text{ (R1)}$   | 0.56                              |
| Tc-Cu(100) | $\text{N}_2^* \rightarrow \text{NNH}^* \text{ (R1)}$   | 0.70                              |
| Ru-Cu(100) | $\text{N}_2^* \rightarrow \text{NNH}^* \text{ (R1)}$   | 1.04                              |
| Rh-Cu(100) | $\text{N}_2^* \rightarrow \text{NNH}^* \text{ (R1)}$   | 1.42                              |
| Ta-Cu(100) | $\text{N}_2^* \rightarrow \text{NNH}^* \text{ (R1)}$   | 0.54                              |
| W-Cu(100)  | $\text{N}_2^* \rightarrow \text{NNH}^* \text{ (R1)}$   | 0.39                              |
| Re-Cu(100) | $\text{N}_2^* \rightarrow \text{NNH}^* \text{ (R1)}$   | 0.50                              |
| Os-Cu(100) | $\text{N}_2^* \rightarrow \text{NNH}^* \text{ (R1)}$   | 0.83                              |
| Ir-Cu(100) | $\text{N}_2^* \rightarrow \text{NNH}^* \text{ (R1)}$   | 1.32                              |
| Fe-Cu(111) | $\text{N}_2^* \rightarrow \text{NNH}^* \text{ (R1)}$   | 0.80                              |
| Co-Cu(111) | $\text{N}_2^* \rightarrow \text{NNH}^* \text{ (R1)}$   | 1.18                              |
| Ni-Cu(111) | $\text{N}_2^* \rightarrow \text{NNH}^* \text{ (R1)}$   | 1.57                              |
| Nb-Cu(111) | $\text{N}_2^* \rightarrow \text{NNH}^* \text{ (R1)}$   | 0.77                              |
| Mo-Cu(111) | $\text{N}_2^* \rightarrow \text{NNH}^* \text{ (R1)}$   | 0.62                              |
| Tc-Cu(111) | $\text{N}_2^* \rightarrow \text{NNH}^* \text{ (R1)}$   | 0.70                              |
| Ru-Cu(111) | $\text{N}_2^* \rightarrow \text{NNH}^* \text{ (R1)}$   | 1.05                              |
| Rh-Cu(111) | $\text{N}_2^* \rightarrow \text{NNH}^* \text{ (R1)}$   | 1.56                              |
| Ta-Cu(111) | $\text{N}_2^* \rightarrow \text{NNH}^* \text{ (R1)}$   | 0.66                              |
| W-Cu(111)  | $\text{N}_2^* \rightarrow \text{NNH}^* \text{ (R1)}$   | 0.46                              |
| Re-Cu(111) | $\text{N}_2^* \rightarrow \text{NNH}^* \text{ (R1)}$   | 0.50                              |
| Os-Cu(111) | $\text{N}_2^* \rightarrow \text{NNH}^* \text{ (R1)}$   | 0.81                              |
| Ir-Cu(111) | $\text{N}_2^* \rightarrow \text{NNH}^* \text{ (R1)}$   | 1.37                              |
| Fe-Cu(110) | $\text{N}_2^* \rightarrow \text{NNH}^* \text{ (R1)}$   | 0.96                              |
| Co-Cu(110) | $\text{N}_2^* \rightarrow \text{NNH}^* \text{ (R1)}$   | 1.15                              |
| Ni-Cu(110) | $\text{N}_2^* \rightarrow \text{NNH}^* \text{ (R1)}$   | 1.53                              |
| Nb-Cu(110) | $\text{N}_2^* \rightarrow \text{NNH}^* \text{ (R1)}$   | 0.60                              |
| Mo-Cu(110) | $\text{N}_2^* \rightarrow \text{NNH}^* \text{ (R1)}$   | 0.46                              |
| Tc-Cu(110) | $\text{N}_2^* \rightarrow \text{NNH}^* \text{ (R1)}$   | 0.58                              |
| Ru-Cu(110) | $\text{N}_2^* \rightarrow \text{NNH}^* \text{ (R1)}$   | 0.96                              |
| Rh-Cu(110) | $\text{N}_2^* \rightarrow \text{NNH}^* \text{ (R1)}$   | 1.20                              |
| Ta-Cu(110) | $\text{NH}_2^* \rightarrow \text{NH}_3^* \text{ (R6)}$ | 0.62                              |
| W-Cu(110)  | $\text{NH}_2^* \rightarrow \text{NH}_3^* \text{ (R6)}$ | 0.60                              |
| Re-Cu(110) | $\text{NH}_2^* \rightarrow \text{NH}_3^* \text{ (R6)}$ | 0.35                              |
| Os-Cu(110) | $\text{N}_2^* \rightarrow \text{NNH}^* \text{ (R1)}$   | 0.65                              |
| Ir-Cu(110) | $\text{N}_2^* \rightarrow \text{NNH}^* \text{ (R1)}$   | 1.16                              |
| Fe-Cu(211) | $\text{N}_2^* \rightarrow \text{NNH}^* \text{ (R1)}$   | 0.92                              |
| Co-Cu(211) | $\text{N}_2^* \rightarrow \text{NNH}^* \text{ (R1)}$   | 1.07                              |
| Ni-Cu(211) | $\text{N}_2^* \rightarrow \text{NNH}^* \text{ (R1)}$   | 1.26                              |
| Nb-Cu(211) | $\text{N}_2^* \rightarrow \text{NNH}^* \text{ (R1)}$   | 0.62                              |



|            |                                  |      |
|------------|----------------------------------|------|
| Mo-Cu(211) | $N_2^* \rightarrow NNH^*$ (R1)   | 0.55 |
| Tc-Cu(211) | $N_2^* \rightarrow NNH^*$ (R1)   | 0.59 |
| Ru-Cu(211) | $N_2^* \rightarrow NNH^*$ (R1)   | 0.91 |
| Rh-Cu(211) | $N_2^* \rightarrow NNH^*$ (R1)   | 1.10 |
| Ta-Cu(211) | $NH_2^* \rightarrow NH_3^*$ (R6) | 0.50 |
| W-Cu(211)  | $NH_2^* \rightarrow NH_3^*$ (R6) | 0.41 |
| Re-Cu(211) | $N_2^* \rightarrow NNH^*$ (R1)   | 0.33 |
| Os-Cu(211) | $N_2^* \rightarrow NNH^*$ (R1)   | 0.59 |
| Ir-Cu(211) | $N_2^* \rightarrow NNH^*$ (R1)   | 1.11 |
| Fe-Cu(320) | $N_2^* \rightarrow NNH^*$ (R1)   | 0.99 |
| Co-Cu(320) | $N_2^* \rightarrow NNH^*$ (R1)   | 1.12 |
| Ni-Cu(320) | $N_2^* \rightarrow NNH^*$ (R1)   | 1.51 |
| Nb-Cu(320) | $N_2^* \rightarrow NNH^*$ (R1)   | 0.68 |
| Mo-Cu(320) | $N_2^* \rightarrow NNH^*$ (R1)   | 0.54 |
| Tc-Cu(320) | $N_2^* \rightarrow NNH^*$ (R1)   | 0.62 |
| Ru-Cu(320) | $N_2^* \rightarrow NNH^*$ (R1)   | 0.90 |
| Rh-Cu(320) | $N_2^* \rightarrow NNH^*$ (R1)   | 1.14 |
| Ta-Cu(320) | $N_2^* \rightarrow NNH^*$ (R1)   | 0.61 |
| W-Cu(320)  | $NH_2^* \rightarrow NH_3^*$ (R6) | 0.57 |
| Re-Cu(320) | $N_2^* \rightarrow NNH^*$ (R1)   | 0.34 |
| Os-Cu(320) | $N_2^* \rightarrow NNH^*$ (R1)   | 0.60 |
| Ir-Cu(320) | $N_2^* \rightarrow NNH^*$ (R1)   | 1.10 |
| Fe-Cu(553) | $N_2^* \rightarrow NNH^*$ (R1)   | 0.90 |
| Co-Cu(553) | $N_2^* \rightarrow NNH^*$ (R1)   | 1.07 |
| Ni-Cu(553) | $N_2^* \rightarrow NNH^*$ (R1)   | 1.53 |
| Nb-Cu(553) | $N_2^* \rightarrow NNH^*$ (R1)   | 0.66 |
| Mo-Cu(553) | $N_2^* \rightarrow NNH^*$ (R1)   | 0.53 |
| Tc-Cu(553) | $N_2^* \rightarrow NNH^*$ (R1)   | 0.58 |
| Ru-Cu(553) | $N_2^* \rightarrow NNH^*$ (R1)   | 0.89 |
| Rh-Cu(553) | $N_2^* \rightarrow NNH^*$ (R1)   | 1.39 |
| Ta-Cu(553) | $N_2^* \rightarrow NNH^*$ (R1)   | 0.51 |
| W-Cu(553)  | $NH_2^* \rightarrow NH_3^*$ (R6) | 0.50 |
| Re-Cu(553) | $N_2^* \rightarrow NNH^*$ (R1)   | 0.33 |
| Os-Cu(553) | $N_2^* \rightarrow NNH^*$ (R1)   | 0.60 |
| Ir-Cu(553) | $N_2^* \rightarrow NNH^*$ (R1)   | 1.12 |
